# Supplementary material
Source: Springer Nature journal article supplement (https://www.springermedizin.de/resource/supplementary/12894_2002_17_MOESM1_ESM.pdf/9513714)
Supplement: MOESM1 [file 9513714]

**Additional file 1: Systematic reviews and meta-analyses on benign prostatic hyperplasia**

| Reference                                                                                                                                                                                                                                      | Question                                                             | Searching                                                                 | Included papers                                                                                        | Quality/<br>sensitivity                        | Inclusion criteria                                                                                                              | Treatment                                    | Duration                           | Outcomes                                                                                                                                                     |
|------------------------------------------------------------------------------------------------------------------------------------------------------------------------------------------------------------------------------------------------|----------------------------------------------------------------------|---------------------------------------------------------------------------|--------------------------------------------------------------------------------------------------------|------------------------------------------------|---------------------------------------------------------------------------------------------------------------------------------|----------------------------------------------|------------------------------------|--------------------------------------------------------------------------------------------------------------------------------------------------------------|
| Eri & Tveter: Alpha-blockage in the treatment of symptomatic BPH. J Urol 1995 154: 923-934                                                                                                                                                     | Efficacy and harm associated with alpha-blockers in BPH              | MEDLINE to Jan 95, plus reference lists and personal files                | 29 randomised placebo-controlled trials with 3,464 men. Only three appeared to be double blind         | No quality analysis<br>No sensitivity analysis | Maximum flow rate of <15 mL/second in 15 studies, less than 20 in one and not reported in 13                                    | Seven different alpha blockers               | 24 weeks or longer in five studies | Change in maximum flow rate<br>% change in residual volume<br>% change in symptoms<br>Dropout rate<br>Adverse effects mentioned                              |
| Boyle et al. Prostate volume predicts outcome of treatment of BPH with finasteride. Urology 1996 48: 398-405. (Bandolier 46)                                                                                                                   | Effect of finasteride on symptoms and examine predictors of outcomes | All randomised trials comparing finasteride 5 mg with placebo at one year | Six trials with 2601 men. No information about methodological quality, though unlikely to be a problem | No quality analysis<br>No sensitivity analysis | Maximum flow rate of 15 or less in five studies, 12-20 in sixth. Moderate symptoms entry criterion of all                       | Finasteride 5 mg                             | 52 weeks                           | Change in maximum flow rate<br>% change in symptoms<br>Analysis by prostate volume                                                                           |
| Chapple et al. Tamsulosin, the first prostate-selective alpha-1A -Adrenoceptor antagonist. A meta-analysis of two randomized, placebo-controlled, multicentre studies in patients with benign prostatic hyperlasia. Eur Urol 1996; 29: 155-167 | Efficacy and harm associated with tamsulosin in BPH                  | No searching                                                              | Two randomised placebo controlled trials with 575 men                                                  | No quality analysis<br>No sensitivity analysis | BPH with maximum flow rate of between 4-12 mL/s, voided volume greater than 120 ml and Boyarsky total symptom score more than 6 | Tamsulosin 0.4 mg (modified release capsule) | 12 weeks                           | Maximum flow rate, voided volume, residual urine, symptom score at baseline, end and change.<br>% change in maximum flow rate and symptoms<br>Adverse events |
| Byrnes et al. Combined analysis of two multicentre studies of finasteride 5 mg in treatment of symptomatic BPH. Prostate Cancer and Prostatic Disease 1997 1: 26-31.                                                                           | Analysis by age older and younger than 65 years                      | No searching                                                              | Two randomised placebo controlled trials with 4,732 men                                                | No quality analysis<br>No sensitivity analysis | BPH with moderate to severe symptoms (AUA scores 8 or more)                                                                     | Finasteride 5 mg                             | 52 weeks                           | Change in symptom score<br>Adverse events<br>PSA<br>DHT                                                                                                      |

| Reference                                                                                                                                              | Question                                                               | Searching                                                                                                        | Included papers                                                                                                                                 | Quality/<br>sensitivity                              | Inclusion criteria                                                                                                      | Treatment      | Duration                                                | Outcomes                                                                                                                                  |
|--------------------------------------------------------------------------------------------------------------------------------------------------------|------------------------------------------------------------------------|------------------------------------------------------------------------------------------------------------------|-------------------------------------------------------------------------------------------------------------------------------------------------|------------------------------------------------------|-------------------------------------------------------------------------------------------------------------------------|----------------|---------------------------------------------------------|-------------------------------------------------------------------------------------------------------------------------------------------|
| Roehrborn. Meta-analysis of randomised clinical trials of finasteride. Urology 1998 51 Suppl 4A: 46-49.                                                | Duplicate of Boyle et al                                               |                                                                                                                  | Includes analysis of prostate size distribution                                                                                                 |                                                      |                                                                                                                         |                |                                                         |                                                                                                                                           |
| Wilt et al. Saw palmetto extracts for treatment of benign prostatic hyperplasia. JAMA 1998 280: 1604-1609 (Bandolier 73)                               | Efficacy and harm associated with Saw palmetto (serenoa repens) in BPH | MEDLINE, EMBASE, Cochrane Library and fields registers, plus reference lists, reviews and trialists. To mid 1997 | 18 randomised comparisons with placebo with 2,939 men lasting at least 30 days. Mean age 65 years. 16 studies were double blind.                | Quality analysis (Schulz)<br>No sensitivity analysis | Initial symptoms consistent with moderate BPH. Baseline mean urinary flow was 5.7 mL/sec and prostate volume was 44 mL. | No information | Mean duration was 9 weeks                               | Peak urinary flow rate vs placebo (8 trials, 642 men)<br>Nocturia vs placebo (10 trials, 634 men)<br>IPSS vs placebo (2 trials, 1440 men) |
| Wilt et al. Beta-sitosterol for the treatment of benign prostatic hyperplasia: a systematic review. BJU International 1999 83: 976-983. (Bandolier 92) | Efficacy with beta-sitosterol in BPH                                   | MEDLINE, EMBASE, Cochrane Library and fields registers, plus reference lists, reviews and trialists. To mid 1998 | 4 randomised comparisons with placebo in 519 men. Mean age about 65 years. All studies double-blind                                             | Quality analysis (Schulz)<br>No sensitivity analysis | Initial symptoms consistent with moderate BPH. Maximum flow rate under 15 ml/sec in two, under 20 mL/sec on one         | No information | Three studies lasted 24-26 weeks, one of 4 weeks.       | Peak urinary flow rate vs placebo<br>Symptom score vs placebo<br>Residual volume vs placebo<br>Mean change in above                       |
| Macdonald et al. A systematic review of cernilton for the treatment of BPH. BJU International 1999 85: 836-841.                                        | Efficacy and safety of rye grass pollen extract (cernilton) for BPH    | MEDLINE, EMBASE, Cochrane Library and fields registers, plus reference lists, reviews and trialists. To mid 1997 | 4 randomised comparisons (2 with placebo, 2 with other complementary therapies) in 444 men. Mean age about 65 years. Three studies double-blind | Quality analysis (Schulz)<br>No sensitivity analysis | Men with BPH                                                                                                            | No information | One study lasted 24 weeks, the others being 12-16 weeks | Peak urinary flow rate<br>Symptom score<br>Residual volume<br>Nocturia                                                                    |

| Reference                                                                                                                                                                                                  | Question                                                                    | Searching                                                                                                        | Included papers                                                                                                | Quality/<br>sensitivity                                                      | Inclusion criteria                                                             | Treatment                                               | Duration                  | Outcomes                                                                                                                                                                                                                    |
|------------------------------------------------------------------------------------------------------------------------------------------------------------------------------------------------------------|-----------------------------------------------------------------------------|------------------------------------------------------------------------------------------------------------------|----------------------------------------------------------------------------------------------------------------|------------------------------------------------------------------------------|--------------------------------------------------------------------------------|---------------------------------------------------------|---------------------------|-----------------------------------------------------------------------------------------------------------------------------------------------------------------------------------------------------------------------------|
| Djavan & Marberger. A meta-analysis of the efficacy and tolerability of alpha1-adrenoreceptor antagonists in patients with lower urinary tract symptoms suggestive of BPH. European Urology 1999 36: 1-13. | Distinguishing between members of drug class for efficacy and harm          | MEDLINE, for English language papers to mid 98                                                                   | 21 studies, "most" of which were randomised and double-blind", 6,333 men in placebo-controlled studies.        | No quality analysis<br>No sensitivity analysis                               | No information                                                                 | Any dose                                                | 1 month to 1 year         | Percentage improvement in symptom score (end vs baseline)<br>Percentage improvement in maximum flow rate<br>Percentage with bothersome adverse effects<br>Percentage with adverse effects related to vasodilator properties |
| Ishani et al. Pygeum africanum for treatment of patients with BPH: a systematic review and quantitative meta-analysis. American Journal of Medicine 2000 109: 654-664.                                     | Efficacy and safety of Pygeum africanum for BPH                             | MEDLINE, EMBASE, Cochrane Library and fields registers, plus reference lists, reviews and trialists. To mid 2000 | 18 randomised trials with 1,562 men lasting at least 30 days. Mean age 66 years. 17 studies were double blind. | Quality analysis (including Schulz)<br>No sensitivity analysis               | Men with BPH                                                                   | 14 studies used a standardise extract                   | Mean duration was 9 weeks | Peak urinary flow rate<br>Symptom score<br>Residual volume<br>Nocturia                                                                                                                                                      |
| Boyle et al. Meta-analysis of clinical trials of permixon in the treatment of symptomatic BPH. Urology 2000 55: 533-539.                                                                                   | Clinical efficacy of permixon (an extract of serenoa repens) versus placebo | No formal search strategy                                                                                        | 13 trials (11 randomised) with 2,859 men                                                                       | No quality analysis<br>Sensitivity analysis of all versus randomised studies | Men with BPH                                                                   | 320 mg a day                                            | Duration 3 to 26 weeks    | Peak urinary flow rate<br>Nocturia<br>Baseline, end, and change                                                                                                                                                             |
| McNeill et al. Postvoid residual urine in patients with lower urinary tract symptoms suggestive of BPH: pooled analysis of eleven controlled studies with alfuzosin. Urology 2001 57: 459-465.             | Effect of alpha-blocker on residual volume and other outcomes.              | No formal search strategy, but data from clinical trials                                                         | 11 double blind randomised trials comparing alfuzosin with placebo. 953 men aged 42-89 years (mean 65 years).  | No quality analysis<br>No sensitivity analysis                               | Men with BPH and residual volume 50-350 mL. Peak flow rate less than 15 mL/sec | 7.5 mg (immediate release) or 10 mg (sustained release) | 4-24 weeks                | Change in residual volume                                                                                                                                                                                                   |

| Reference                                                                                                                                                                                                                               | Question                                     | Searching                                                                             | Included papers                                              | Quality/<br>sensitivity                                        | Inclusion criteria                                                    | Treatment      | Duration                                                            | Outcomes                                                                                                                                           |
|-----------------------------------------------------------------------------------------------------------------------------------------------------------------------------------------------------------------------------------------|----------------------------------------------|---------------------------------------------------------------------------------------|--------------------------------------------------------------|----------------------------------------------------------------|-----------------------------------------------------------------------|----------------|---------------------------------------------------------------------|----------------------------------------------------------------------------------------------------------------------------------------------------|
| Yang et al. Transurethral incision compared with transurethral resection of the prostate for bladder outlet obstruction: a systematic review and meta-analysis of randomized controlled trials. Journal of Urology 2001 165: 1526-1532. | Efficacy of incision compared with resection | MEDLINE, EMBASE, ISA, Cochrane Library, plus Cochrane Review Group databases, to 1999 | 9 randomised trials with 691 men. Mean ages 60s to early 70s | Two quality scores                                             | Lower urinary tract symptoms suggestive of bladder outlet obstruction | Not applicable | Follow up at various times from 3-60 months. 12 month data analysed | Maximum flow rate (4 trials, 226 men)<br>Symptom score (4 trials, 243 men)<br>Actual baseline and 3/12 month scores and flow rates where available |
| Roehrborn et al. Clinical predictors of spontaneous acute urinary retention in men with LUTS and clinical BPH: a comprehensive analysis of the pooled placebo groups of several large clinical trials. Urology 2001 58: 210-216.        | Clinical predictors of acute retention       | No formal search strategy, but data from clinical trials                              | 3,780 men, mean age 64 years, peak flow 11 mL/sec, IPSS 15   | Not applicable - all four studies randomised and double-blind. | Men with BPH. Baseline mean data given                                | Placebo        | 2-4 years                                                           | Predictive factors for acute urinary retention.                                                                                                    |
